# Supplementary material
Source: publisher site journal article supplement (https://spandidos-publications.com/4288/downloadSupplementary)
Supplement: Supplementary file 1 [file downloadSupplementary]

## Sheet: Sheet1
Table SII. RT-qPCR primers for DEGs and RASGs.
DEGs	Forward				Reverse
CCDC80	GATCCTGGAGCAGCCTCTGG				ACATGGCTTCCAGCCTGACC
PSAT1	GTCCAGTGGAGCCCCAAAA				TGCCTCCCACAGACCTATGC
PSPH	CACGGTCATCAGAGAAGAAG				GGTTGCTCTGCTATGAGTCT
RASGs	Model reverse			AS reverse			Model/AS forward
CDK11A	GGCATCATAGCCATTCAGCAGAAG			GAGAAAAGAAAAATGGAAGCATG			CTCTCCTGGAATGCTCCCTTGCCA
PDXDC1	TCCCACAGTGGGACCACCCTGCT			TCTCCCCGAGTTCCTAAAACTGCT			CTGGGAGAACAGCTGAAGCAGCT
Genes with two column primer sequences are DEGs, and genes with three column primer sequences are RASGs. AS, alternative splicing; DEGs, differentially expressed genes; RASGs, regulated alternative splicing genes.
